# Supplementary material
Source: PubMed Central journal article supplement (PMC307687)

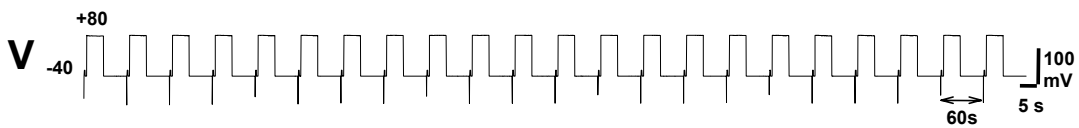

**100 %CO<sub>2</sub>**

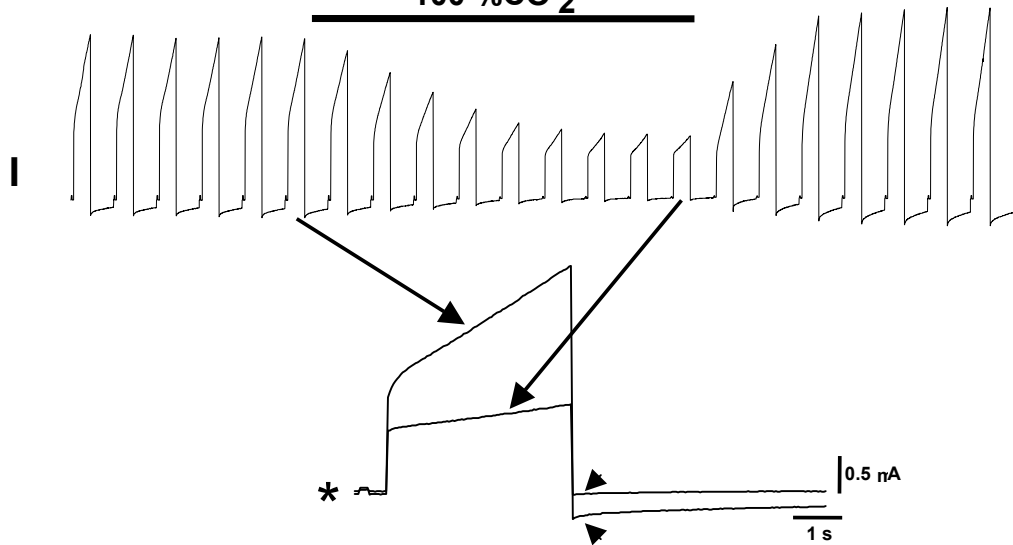

Supplement: pnas_100_26_16030__2.pdf [file pnas_100_26_16030__2.pdf]

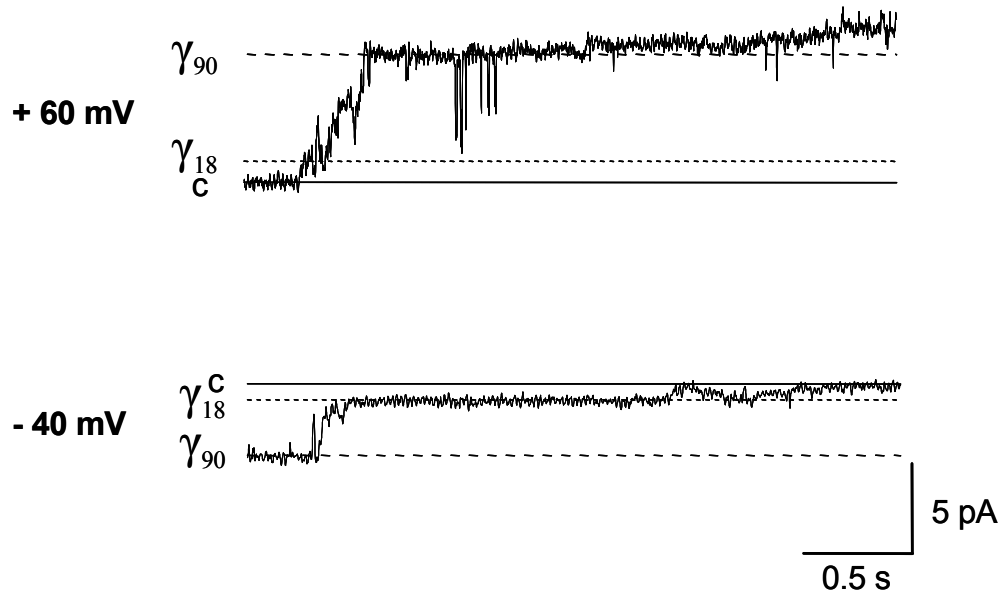

Supplement: pnas_100_26_16030__4.pdf [file pnas_100_26_16030__4.pdf]

**A**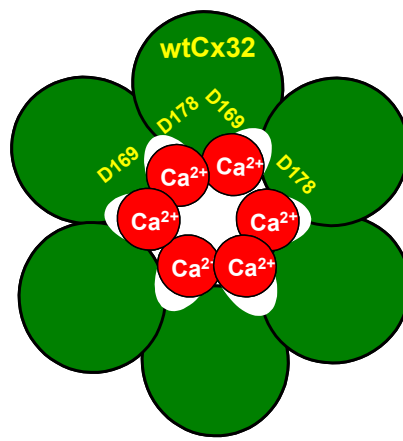**B** **$\text{Ca}^{2+}$  BINDING-SITES**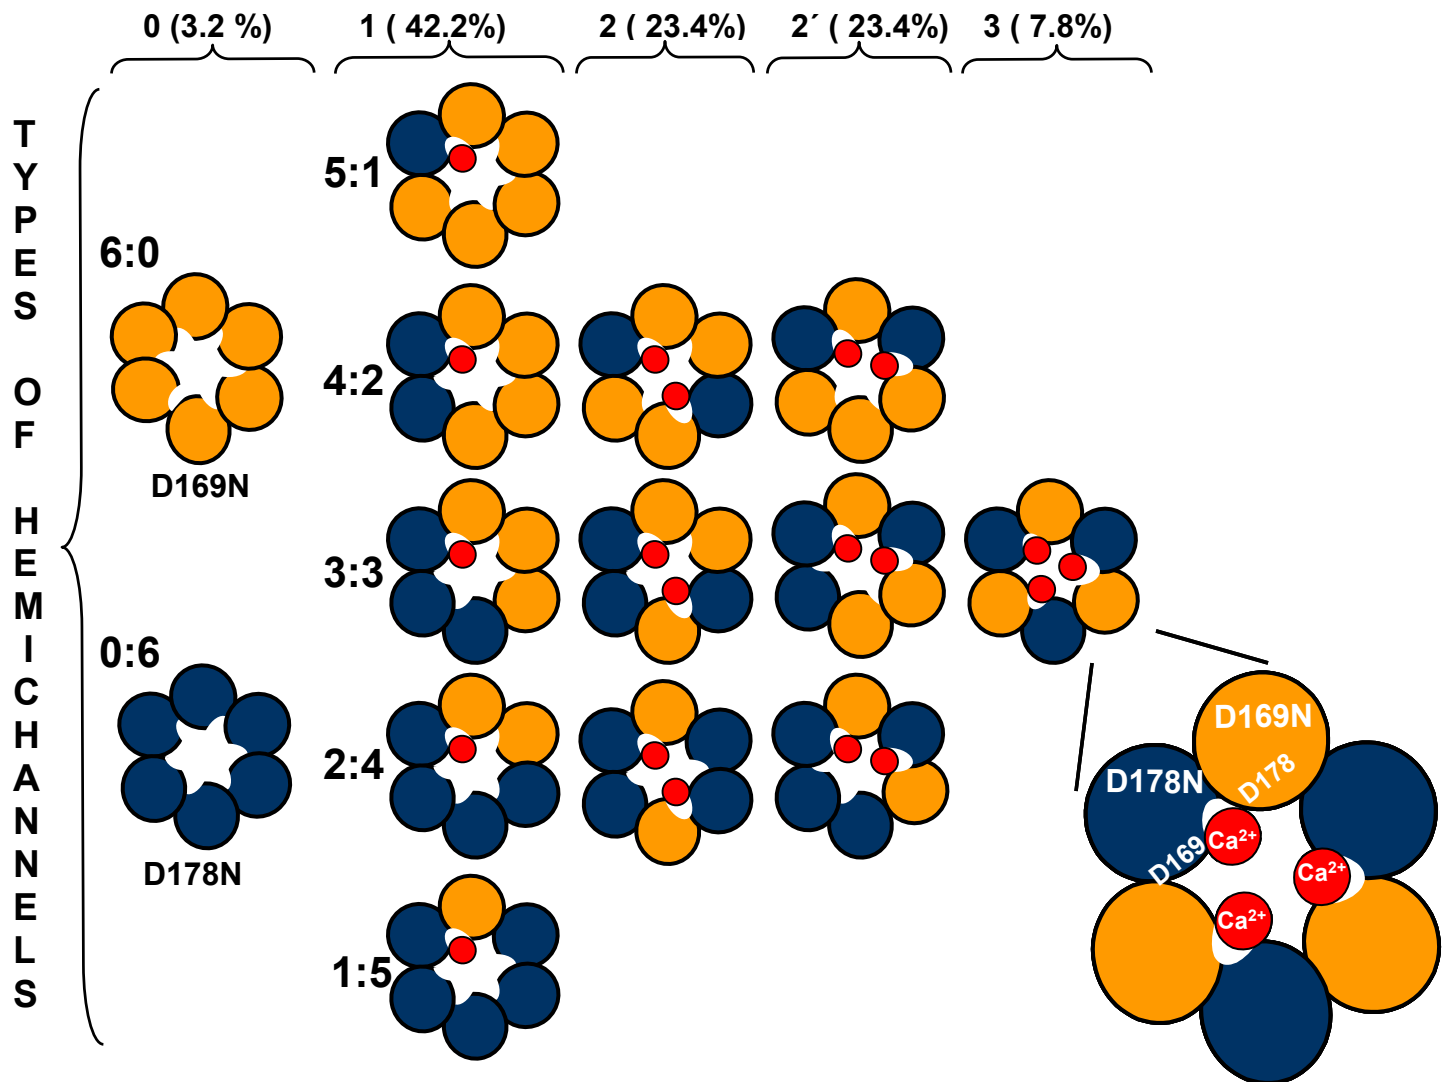

Supplement: pnas_100_26_16030__6.pdf [file pnas_100_26_16030__6.pdf]
